# Supplementary material for: Urban microbial ecology of a freshwater estuary of Lake Michigan
Source: PubMed Central journal article supplement (PMC4746012; doi:10.12952/journal.elementa.000064), 2015-07-29
Supplement: NIHMS719611-supplement-Table_S1.pdf [file NIHMS719611-supplement-Table_S1.pdf]

**Supplementary Table S1. Sample Metadata.**

Sample metadata includes the Sample ID used in the paper, the sequencing ID that can be used to reference the raw sequence file in the NCBI Short Read Archive, the sample collection date, the type of environment from which the sample was collected, and the amount of rainfall or conditions when the sample was collected. Baseflow indicates no rain or significant antecedent rainfall. CSO = Combined sewerage overflow.

| <b>Site ID</b> | <b>Sequence ID (SRA)</b>  | <b>Sample Date</b> | <b>Environment</b> | <b>Weather*</b> |
|----------------|---------------------------|--------------------|--------------------|-----------------|
| MH1            | 152_1_mile_06_04_12       | 6/4/12             | Lake               | baseflow        |
| MH2            | 153_2_mile_06_04_12       | 6/4/12             | Lake               | baseflow        |
| MH3            | 154_5_mile_06_04_12       | 6/4/12             | Lake               | baseflow        |
| DP1            | 155_Doc_In_06_04_12       | 6/4/12             | Lake               | baseflow        |
| DP2            | 156_Doc_Mid_06_04_12      | 6/4/12             | Lake               | baseflow        |
| DP3            | 157_Doc_Out_06_04_12      | 6/4/12             | Lake               | baseflow        |
| Junction4      | 50_Junction_6_22_11       | 6/22/11            | Harbor             | 0.69, CSO       |
| Junction2      | 52_Junction_8_23_11       | 8/23/11            | Harbor             | <0.5            |
| Junction3      | 54_Junction_9_28_11       | 9/28/11            | Harbor             | antecedent rain |
| Junction1      | 150_Junction_06_04_12     | 6/4/12             | Harbor             | baseflow        |
| Gap4           | 51_Gap_6_22_11            | 6/22/11            | Harbor             | 0.69, CSO       |
| Gap2           | 53_Gap_8_23_11            | 8/23/11            | Harbor             | <0.5            |
| Gap3           | 55_Gap_9_28_11            | 9/28/11            | Harbor             | antecedent rain |
| Gap1           | 151_Gap_6_04_12           | 6/4/12             | Harbor             | baseflow        |
| KK1            | 160_KK_River_07_28_11     | 7/28/11            | River              | 4.2             |
| KK2            | 161_KK_River_10_14_11     | 10/14/11           | River              | antecedent rain |
| MKE1           | 158_MKE_River_07_28_11    | 7/28/11            | River              | 4.2             |
| MKE2           | 162_MKE_River_10_14_11    | 10/14/11           | River              | antecedent rain |
| MNE1           | 159_MNE_River_07_28_11    | 7/28/11            | River              | 4.2             |
| MNE2           | 163_MNE_River_10_14_11    | 10/14/11           | River              | antecedent rain |
| J11            | 164_JI_WWTP_Day1_08_07_12 | 8/7/12             | Sewage             | baseflow        |
| J12            | 49_JI_WWTP_4_4_12         | 4/4/12             | Sewage             | baseflow        |
| J13            | 199_Milwaukee JI          | 5/1/13             | Sewage             | baseflow        |
| SS1            | SS_WWTP_1_25_11_16s       | 1/25/11            | Sewage             | baseflow        |
| SS2            | SS_WWTP_4_11_11_16s       | 4/11/11            | Sewage             | baseflow        |
| HC23           | 17_FMRHC23_6_4_10         | 6/4/10             | Stormwater         | 0.46            |
| MN40           | 23_FMRMN40_9_1_10         | 9/1/10             | Stormwater         | 1.60            |
| MN53           | 26_FMRMN53_10_26_10       | 10/26/10           | Stormwater         | 1.45            |
| SWC01B         | 27_SWC01B_6_16_12         | 6/16/12            | Stormwater         | 0.03            |
| MN73           | 29_FMRMN73_6_15_11        | 6/15/11            | Stormwater         | 0.46            |
| UC10           | 32_FMRUC10_6_20_11        | 6/20/11            | Stormwater         | 1.14            |
| HAC13          | 36_FMRHAC13_7_22_11       | 7/22/11            | Stormwater         | 0.86            |
| HAC21          | 37_FMRHAC21_7_22_11       | 7/22/11            | Stormwater         | 0.86            |
| HAC22          | 38_FMRHAC22_7_22_11       | 7/22/11            | Stormwater         | 0.86            |

|       |                     |         |            |      |
|-------|---------------------|---------|------------|------|
| HC33  | 42_FMRHC33_7_22_11  | 7/22/11 | Stormwater | 0.86 |
| HC43  | 43_FMRHC43_7_22_11  | 7/22/11 | Stormwater | 0.86 |
| UC09  | 46_FMRUC09_6_20_11  | 6/20/11 | Stormwater | 1.14 |
| HAC16 | 47_FMRHAC16_9_29_11 | 9/29/11 | Stormwater | 0.48 |

---

\*Rainfall values are given in cm.
