# Supplementary material for: Urban microbial ecology of a freshwater estuary of Lake Michigan
Source: PubMed Central journal article supplement (PMC4746012; doi:10.12952/journal.elementa.000064), 2015-07-29
Supplement: NIHMS719611-supplement-Table_S2.pdf [file NIHMS719611-supplement-Table_S2.pdf]

**Supplementary Tables S2. Sample diversity analysis**

Supplementary Table S2A. Hill Diversity (effective number of species) was calculated for four diversity orders (0, 1, 2 and infinity) that correspond to the common diversity indices Richness, Shannon Diversity, Inverse Simpson Diversity and Minimum Entropy.

|                  | <b>Hill Diversity of Taxa by Sample</b> |            |            |            |
|------------------|-----------------------------------------|------------|------------|------------|
|                  | <b>q=0</b>                              | <b>q=1</b> | <b>q=2</b> | <b>q=∞</b> |
| Lake DP1         | 557                                     | 22.4       | 11.4       | 4.4        |
| Lake DP2         | 615                                     | 20.8       | 9.6        | 3.7        |
| Lake DP3         | 575                                     | 22.2       | 10.7       | 4.1        |
| Lake MH1         | 649                                     | 24.7       | 10.9       | 4.0        |
| Lake MH2         | 666                                     | 23.1       | 10.1       | 3.7        |
| Lake MH3         | 584                                     | 22.3       | 10.5       | 3.9        |
| Harbor Gap1      | 705                                     | 32.8       | 16.6       | 5.7        |
| Harbor Gap2      | 760                                     | 43.7       | 20.1       | 6.3        |
| Harbor Gap3      | 1153                                    | 53.2       | 21.7       | 7.3        |
| Harbor Gap4      | 1479                                    | 68.6       | 21.6       | 6.5        |
| Harbor Junction1 | 936                                     | 45.0       | 20.5       | 7.6        |
| Harbor Junction2 | 924                                     | 56.1       | 21.9       | 5.9        |
| Harbor Junction3 | 1233                                    | 46.6       | 18.3       | 6.9        |
| Harbor Junction4 | 1546                                    | 69.3       | 20.3       | 5.8        |
| River KK1        | 1311                                    | 45.1       | 13.2       | 4.7        |
| River KK2        | 940                                     | 44.2       | 21.8       | 8.3        |
| River MKE1       | 1446                                    | 72.0       | 26.2       | 8.4        |
| River MKE2       | 1148                                    | 32.9       | 11.0       | 3.8        |
| River MNE1       | 1252                                    | 45.0       | 14.6       | 4.9        |
| River MNE2       | 983                                     | 32.9       | 14.1       | 5.0        |
| SW HAC13         | 1509                                    | 171.9      | 68.3       | 16.0       |
| SW HAC16         | 1404                                    | 93.8       | 39.2       | 11.3       |
| SW HAC21         | 1152                                    | 57.3       | 13.5       | 4.1        |
| SW HAC22         | 1125                                    | 39.2       | 11.8       | 4.2        |
| SW HC23          | 1461                                    | 113.1      | 38.6       | 10.4       |
| SW HC33          | 1629                                    | 152.3      | 64.7       | 20.4       |
| SW HC43          | 1217                                    | 50.1       | 21.8       | 9.3        |
| SW MN40          | 1675                                    | 176.1      | 67.2       | 17.4       |
| SW MN53          | 1132                                    | 39.9       | 13.5       | 4.5        |
| SW MN73          | 1107                                    | 27.7       | 9.3        | 3.6        |
| SW UC09          | 1429                                    | 112.0      | 40.7       | 10.9       |
| SW UC10          | 1569                                    | 133.3      | 52.1       | 15.2       |
| SWC01B           | 1061                                    | 31.9       | 10.8       | 3.9        |
| Sewage JI1       | 1073                                    | 46.1       | 20.1       | 7.0        |

|            |      |      |      |     |
|------------|------|------|------|-----|
| Sewage JI2 | 1149 | 31.3 | 11.9 | 5.0 |
| Sewage JI3 | 1410 | 55.3 | 20.8 | 7.1 |
| Sewage SS1 | 1029 | 50.6 | 18.4 | 5.7 |
| Sewage SS2 | 1051 | 37.1 | 14.5 | 5.9 |

Supplementary Table S2B. Hill Diversity (effective species numbers) was calculated for four diversity orders (0, 1, 2 and infinity) that correspond to the common diversity indices Richness, Shannon Diversity, Inverse Simpson Diversity and Minimum Entropy. The *renyiaccum* function in R was used to calculate Hill numbers for each environment based on the average of all samples or all samples pooled.

| <b>Hill Diversity of Taxa by Environment</b> |            |            |            |            |
|----------------------------------------------|------------|------------|------------|------------|
|                                              | <b>q=0</b> | <b>q=1</b> | <b>q=2</b> | <b>q=∞</b> |
| <b>Lake, average</b>                         | 608.0      | 22.5       | 10.5       | 4.0        |
| <b>Lake, pooled</b>                          | 1062.0     | 23.1       | 10.6       | 4.0        |
| <b>Harbor, average</b>                       | 1101.9     | 52.3       | 20.2       | 6.5        |
| <b>Harbor, pooled</b>                        | 1970.0     | 60.3       | 23.0       | 7.7        |
| <b>River, average</b>                        | 1177.7     | 45.5       | 17.0       | 5.9        |
| <b>River, pooled</b>                         | 1869.0     | 55.5       | 18.3       | 5.4        |
| <b>Stormwater, average</b>                   | 1339.6     | 91.2       | 34.4       | 10.0       |
| <b>Stormwater, pooled</b>                    | 2567.0     | 148.8      | 50.0       | 12.3       |
| <b>Sewage, average</b>                       | 1141.2     | 44.0       | 17.1       | 6.2        |
| <b>Sewage, pooled</b>                        | 1830.0     | 52.5       | 20.9       | 9.0        |
