# Supplementary material for: Urban microbial ecology of a freshwater estuary of Lake Michigan
Source: PubMed Central journal article supplement (PMC4746012; doi:10.12952/journal.elementa.000064), 2015-07-29
Supplement: NIHMS719611-supplement-Table_S3.pdf [file NIHMS719611-supplement-Table_S3.pdf]

**Supplementary Table S3. LEfSE biomarker taxa results**

The analysis using specific environmental classes included sewage, stormwater, river, harbor, and lake. The general classes were urban, which grouped sewage and stormwater and aquatic, which grouped river, harbor, and lake. The specific environment analysis produced significantly more biomarkers (530) than the general analysis (279). Most biomarker taxa identified in the general analysis agreed with the specific analysis (i.e., Urban biomarkers were also Stormwater or Sewage biomarkers and Aquatic biomarkers were also River, Harbor, or Lake biomarkers).

| Taxon                                                                                                | Environment |         |
|------------------------------------------------------------------------------------------------------|-------------|---------|
|                                                                                                      | Specific    | General |
| Bacteria_Acidobacteria_Holophagae                                                                    | Stormwater  | Urban   |
| Bacteria_Actinobacteria_Actinobacteria_Acidimicrobiales                                              | Stormwater  | Urban   |
| Bacteria_Actinobacteria_Actinobacteria_Actinomycetales                                               | Stormwater  | Urban   |
| Bacteria_Actinobacteria_Actinobacteria_Actinomycetales_Cellulomonadaceae                             | Stormwater  | Urban   |
| Bacteria_Actinobacteria_Actinobacteria_Actinomycetales_Cellulomonadaceae_Cellulomonas                | Stormwater  | Urban   |
| Bacteria_Actinobacteria_Actinobacteria_Actinomycetales_Corynebacteriaceae_Corynebacterium_glutamicum | Stormwater  | Urban   |
| Bacteria_Actinobacteria_Actinobacteria_Actinomycetales_Geodermatophilaceae_Blastococcus              | Stormwater  | Urban   |
| Bacteria_Actinobacteria_Actinobacteria_Actinomycetales_Geodermatophilaceae_Modestobacter             | Stormwater  | Urban   |
| Bacteria_Actinobacteria_Actinobacteria_Actinomycetales_Kineosporiaceae_Kineococcus                   | Stormwater  | Urban   |
| Bacteria_Actinobacteria_Actinobacteria_Actinomycetales_Microbacteriaceae_Leucobacter                 | Stormwater  | Urban   |
| Bacteria_Actinobacteria_Actinobacteria_Actinomycetales_Microbacteriaceae_Microbacterium              | Stormwater  | Urban   |
| Bacteria_Actinobacteria_Actinobacteria_Actinomycetales_Micrococcaceae_Arthrobacter                   | Stormwater  | Urban   |
| Bacteria_Actinobacteria_Actinobacteria_Actinomycetales_Nocardiaceae                                  | Stormwater  | Urban   |
| Bacteria_Actinobacteria_Actinobacteria_Actinomycetales_Nocardiaceae_Nocardia                         | Stormwater  | Urban   |
| Bacteria_Actinobacteria_Actinobacteria_Actinomycetales_Nocardiaceae_Rhodococcus                      | Stormwater  | Urban   |
| Bacteria_Actinobacteria_Actinobacteria_Actinomycetales_Nocardiaceae_Williamsia                       | Stormwater  | Urban   |
| Bacteria_Actinobacteria_Actinobacteria_Actinomycetales_Nocardiodaceae_Marmoricola                    | Stormwater  | Urban   |
| Bacteria_Actinobacteria_Actinobacteria_Actinomycetales_Nocardiodaceae_Nocardioides                   | Stormwater  | Urban   |
| Bacteria_Actinobacteria_Actinobacteria_Actinomycetales_Propionibacteriaceae                          | Stormwater  | Urban   |
| Bacteria_Actinobacteria_Actinobacteria_Actinomycetales_Propionibacteriaceae_Friedmanniella           | Stormwater  | Urban   |
| Bacteria_Actinobacteria_Actinobacteria_Actinomycetales_Propionibacteriaceae_Microlunatus             | Stormwater  | Urban   |

|                                                                                                                    |            |       |
|--------------------------------------------------------------------------------------------------------------------|------------|-------|
| Bacteria_Actinobacteria_Actinobacteria_Actinomycetales_Streptomycetaceae_Streptomyces                              | Stormwater | Urban |
| Bacteria_Actinobacteria_Actinobacteria_Solirubrobacterales                                                         | Stormwater | Urban |
| Bacteria_Actinobacteria_Actinobacteria_Solirubrobacterales_Patulibacteraceae_Patulibacter                          | Stormwater | Urban |
| Bacteria_Bacteroidetes_Bacteroidia_Bacteroidales_Porphyrimonadaceae                                                | Stormwater | Urban |
| Bacteria_Bacteroidetes_Flavobacteria_Flavobacteriales_Flavobacteriaceae                                            | Stormwater | Urban |
| Bacteria_Bacteroidetes_Flavobacteria_Flavobacteriales_Flavobacteriaceae_Chryseobacterium                           | Stormwater | Urban |
| Bacteria_Bacteroidetes_Flavobacteria_Flavobacteriales_Flavobacteriaceae_Elizabethkingia                            | Stormwater | Urban |
| Bacteria_Bacteroidetes_Flavobacteria_Flavobacteriales_Flavobacteriaceae_Myroides                                   | Stormwater | Urban |
| Bacteria_Bacteroidetes_Sphingobacteria_Sphingobacteriales_Chitinophagaceae_Filimonas                               | Stormwater | Urban |
| Bacteria_Bacteroidetes_Sphingobacteria_Sphingobacteriales_Cytophagaceae_Dyadobacter                                | Stormwater | Urban |
| Bacteria_Bacteroidetes_Sphingobacteria_Sphingobacteriales_Cytophagaceae_Flexibacter                                | Stormwater | Urban |
| Bacteria_Bacteroidetes_Sphingobacteria_Sphingobacteriales_Cytophagaceae_Hymenobacter                               | Stormwater | Urban |
| Bacteria_Bacteroidetes_Sphingobacteria_Sphingobacteriales_Cytophagaceae_Spirosoma_rigui                            | Stormwater | Urban |
| Bacteria_Bacteroidetes_Sphingobacteria_Sphingobacteriales_Sphingobacteriaceae_Sphingobacteriaceae_Sphingobacterium | Stormwater | Urban |
| Bacteria_Chlamydiae_Chlamydiae_Chlamydiales_Parachlamydiaceae_Proteochlamydia                                      | Stormwater | Urban |
| Bacteria_Chloroflexi_Thermomicrobia_Sphaerobacterales_Sphaerobacteraceae_Sphaerobacter                             | Stormwater | Urban |
| Bacteria_Cyanobacteria                                                                                             | Stormwater | Urban |
| Bacteria_Cyanobacteria_Cyanobacteria                                                                               | Stormwater | Urban |
| Bacteria_Cyanobacteria_Cyanobacteria_SubsectionII_SubgroupII_Chroococciopsis                                       | Stormwater | Urban |
| Bacteria_Firmicutes_Bacilli_Bacillales_Bacillaceae_Bacillus                                                        | Stormwater | Urban |
| Bacteria_Firmicutes_Bacilli_Bacillales_Paenibacillaceae_Cohnella                                                   | Stormwater | Urban |
| Bacteria_Firmicutes_Bacilli_Bacillales_Paenibacillaceae_Paenibacillus                                              | Stormwater | Urban |
| Bacteria_Firmicutes_Bacilli_Bacillales_Paenibacillaceae_Saccharibacillus                                           | Stormwater | Urban |
| Bacteria_Firmicutes_Bacilli_Bacillales_Planococcaceae_Kurthia_Kurthia                                              | Stormwater | Urban |
| Bacteria_Firmicutes_Bacilli_Bacillales_Unassigned_Exiguobacterium                                                  | Stormwater | Urban |
| Bacteria_Firmicutes_Bacilli_Lactobacillales_Leuconostocaceae_Leuconostoc                                           | Stormwater | Urban |
| Bacteria_Firmicutes_Bacilli_Lactobacillales_Leuconostocaceae_Weissella                                             | Stormwater | Urban |
| Bacteria_Firmicutes_Bacilli_Lactobacillales_Streptococcaceae_Streptococcus_castoreus                               | Stormwater | Urban |

|                                                                                                        |            |       |
|--------------------------------------------------------------------------------------------------------|------------|-------|
| Bacteria_Firmicutes_Erysipelotrichi_Erysipelotrichales_Erysipelotrichaceae_Erysipelothrix              | Stormwater | Urban |
| Bacteria_OD1                                                                                           | Stormwater | Urban |
| Bacteria_Planctomycetes                                                                                | Stormwater | Urban |
| Bacteria_Planctomycetes_Phycisphaerae                                                                  | Stormwater | Urban |
| Bacteria_Proteobacteria_Alphaproteobacteria                                                            | Stormwater | Urban |
| Bacteria_Proteobacteria_Alphaproteobacteria_Caulobacterales_Caulobacteraceae_Brevundimonas             | Stormwater | Urban |
| Bacteria_Proteobacteria_Alphaproteobacteria_Rhizobiales_Aurantimonadaceae_Aurantimonas                 | Stormwater | Urban |
| Bacteria_Proteobacteria_Alphaproteobacteria_Rhizobiales_Bradyrhizobiaceae_Bosea                        | Stormwater | Urban |
| Bacteria_Proteobacteria_Alphaproteobacteria_Rhizobiales_Brucellaceae_Ochrobactrum                      | Stormwater | Urban |
| Bacteria_Proteobacteria_Alphaproteobacteria_Rhizobiales_Brucellaceae_Pseudochrobactrum                 | Stormwater | Urban |
| Bacteria_Proteobacteria_Alphaproteobacteria_Rhizobiales_Hyphomicrobiaceae_Devosia                      | Stormwater | Urban |
| Bacteria_Proteobacteria_Alphaproteobacteria_Rhizobiales_Phylobacteriaceae_Mesorhizobium                | Stormwater | Urban |
| Bacteria_Proteobacteria_Alphaproteobacteria_Rhizobiales_Rhizobiaceae_Rhizobium                         | Stormwater | Urban |
| Bacteria_Proteobacteria_Alphaproteobacteria_Rhodobacterales_Rhodobacteraceae_Amaricoccus               | Stormwater | Urban |
| Bacteria_Proteobacteria_Alphaproteobacteria_Rhodobacterales_Rhodobacteraceae_Amaricoccus_tamworthensis | Stormwater | Urban |
| Bacteria_Proteobacteria_Alphaproteobacteria_Rhodobacterales_Rhodobacteraceae_Paracoccus                | Stormwater | Urban |
| Bacteria_Proteobacteria_Alphaproteobacteria_Rhodobacterales_Rhodobacteraceae_Pseudorhodobacter         | Stormwater | Urban |
| Bacteria_Proteobacteria_Alphaproteobacteria_Rhodobacterales_Rhodobacteraceae_Rubellimicrobium          | Stormwater | Urban |
| Bacteria_Proteobacteria_Alphaproteobacteria_Rhodobacterales_Rhodobacteraceae_Rubrimonas                | Stormwater | Urban |
| Bacteria_Proteobacteria_Alphaproteobacteria_Rhodospirillales                                           | Stormwater | Urban |
| Bacteria_Proteobacteria_Alphaproteobacteria_Rhodospirillales_Acetobacteraceae_Acidiphilium             | Stormwater | Urban |
| Bacteria_Proteobacteria_Alphaproteobacteria_Rhodospirillales_Acetobacteraceae_Roseomonas_vinacea       | Stormwater | Urban |
| Bacteria_Proteobacteria_Alphaproteobacteria_Rhodospirillales_Acetobacteraceae_Teichococcus             | Stormwater | Urban |
| Bacteria_Proteobacteria_Alphaproteobacteria_Rhodospirillales_Rhodospirillaceae                         | Stormwater | Urban |
| Bacteria_Proteobacteria_Alphaproteobacteria_Rhodospirillales_Rhodospirillaceae_Azospirillum            | Stormwater | Urban |
| Bacteria_Proteobacteria_Alphaproteobacteria_Rhodospirillales_Rhodospirillaceae_Magnetospirillum        | Stormwater | Urban |
| Bacteria_Proteobacteria_Alphaproteobacteria_Rhodospirillales_Rhodospirillaceae_Skermanella             | Stormwater | Urban |
| Bacteria_Proteobacteria_Alphaproteobacteria_Rhodospirillales_Rhodospirillaceae_Thalassospira           | Stormwater | Urban |

|                                                                                                             |            |       |
|-------------------------------------------------------------------------------------------------------------|------------|-------|
| Bacteria_Proteobacteria_Alphaproteobacteria_Sphingomonadales_Sphingomonadaceae_Sphingobium                  | Stormwater | Urban |
| Bacteria_Proteobacteria_Betaproteobacteria_Burkholderiales_Burkholderiaceae_Burkholderia                    | Stormwater | Urban |
| Bacteria_Proteobacteria_Betaproteobacteria_Burkholderiales_Comamonadaceae_Aquabacterium                     | Stormwater | Urban |
| Bacteria_Proteobacteria_Betaproteobacteria_Burkholderiales_Comamonadaceae_Giesbergeria                      | Stormwater | Urban |
| Bacteria_Proteobacteria_Betaproteobacteria_Burkholderiales_Comamonadaceae_Pelomonas                         | Stormwater | Urban |
| Bacteria_Proteobacteria_Betaproteobacteria_Burkholderiales_Comamonadaceae_Ramlibacter                       | Stormwater | Urban |
| Bacteria_Proteobacteria_Betaproteobacteria_Burkholderiales_Comamonadaceae_Roseateles                        | Stormwater | Urban |
| Bacteria_Proteobacteria_Betaproteobacteria_Burkholderiales_Oxalobacteraceae                                 | Stormwater | Urban |
| Bacteria_Proteobacteria_Betaproteobacteria_Burkholderiales_Oxalobacteraceae_Duganella                       | Stormwater | Urban |
| Bacteria_Proteobacteria_Betaproteobacteria_Burkholderiales_Oxalobacteraceae_Herbaspirillum                  | Stormwater | Urban |
| Bacteria_Proteobacteria_Betaproteobacteria_Burkholderiales_Oxalobacteraceae_Herminiimonas                   | Stormwater | Urban |
| Bacteria_Proteobacteria_Betaproteobacteria_Burkholderiales_Oxalobacteraceae_Massilia                        | Stormwater | Urban |
| Bacteria_Proteobacteria_Betaproteobacteria_Burkholderiales_Oxalobacteraceae_Massilia_albidiflava            | Stormwater | Urban |
| Bacteria_Proteobacteria_Betaproteobacteria_Burkholderiales_Oxalobacteraceae_Massilia_dura                   | Stormwater | Urban |
| Bacteria_Proteobacteria_Betaproteobacteria_Burkholderiales_Oxalobacteraceae_Oxalobacter                     | Stormwater | Urban |
| Bacteria_Proteobacteria_Betaproteobacteria_Neisseriales_Neisseriaceae_Aquaspirillum                         | Stormwater | Urban |
| Bacteria_Proteobacteria_Betaproteobacteria_Rhodocyclales_Rhodocyclaceae                                     | Stormwater | Urban |
| Bacteria_Proteobacteria_Betaproteobacteria_Rhodocyclales_Rhodocyclaceae_Azoarcus                            | Stormwater | Urban |
| Bacteria_Proteobacteria_Betaproteobacteria_Rhodocyclales_Rhodocyclaceae_Azovibrio                           | Stormwater | Urban |
| Bacteria_Proteobacteria_Betaproteobacteria_Rhodocyclales_Rhodocyclaceae_Uliginosibacterium                  | Stormwater | Urban |
| Bacteria_Proteobacteria_Deltaproteobacteria_Bdellovibrionales_Bacteriovoraceae_Bacteriovorax                | Stormwater | Urban |
| Bacteria_Proteobacteria_Deltaproteobacteria_Bdellovibrionales_Bdellovibrionaceae_Bdellovibrio               | Stormwater | Urban |
| Bacteria_Proteobacteria_Deltaproteobacteria_Bdellovibrionales_Bdellovibrionaceae_Bdellovibrio_bacteriovorus | Stormwater | Urban |
| Bacteria_Proteobacteria_Deltaproteobacteria_Myxococcales_Cystobacteraceae                                   | Stormwater | Urban |
| Bacteria_Proteobacteria_Deltaproteobacteria_Myxococcales_Haliangiaceae_Haliangium                           | Stormwater | Urban |
| Bacteria_Proteobacteria_Deltaproteobacteria_Myxococcales_Phaselicystidaceae_Phaselicystis                   | Stormwater | Urban |
| Bacteria_Proteobacteria_Deltaproteobacteria_Myxococcales_Polyangiaceae_Chondromyces                         | Stormwater | Urban |
| Bacteria_Proteobacteria_Deltaproteobacteria_Myxococcales_Polyangiaceae_Sorangium                            | Stormwater | Urban |

|                                                                                                      |            |       |
|------------------------------------------------------------------------------------------------------|------------|-------|
| Bacteria_Proteobacteria_Gammaproteobacteria                                                          | Stormwater | Urban |
| Bacteria_Proteobacteria_Gammaproteobacteria_Acidithiobacillales                                      | Stormwater | Urban |
| Bacteria_Proteobacteria_Gammaproteobacteria_Alteromonadales_Idiomarinaceae_Idiomarina                | Stormwater | Urban |
| Bacteria_Proteobacteria_Gammaproteobacteria_Alteromonadales_Shewanellaceae_Shewanella                | Stormwater | Urban |
| Bacteria_Proteobacteria_Gammaproteobacteria_Chromatiales_Chromatiaceae_Alishewanella                 | Stormwater | Urban |
| Bacteria_Proteobacteria_Gammaproteobacteria_Enterobacteriales_Enterobacteriaceae                     | Stormwater | Urban |
| Bacteria_Proteobacteria_Gammaproteobacteria_Enterobacteriales_Enterobacteriaceae_Citrobacter         | Stormwater | Urban |
| Bacteria_Proteobacteria_Gammaproteobacteria_Enterobacteriales_Enterobacteriaceae_Erwinia             | Stormwater | Urban |
| Bacteria_Proteobacteria_Gammaproteobacteria_Enterobacteriales_Enterobacteriaceae_Erwinia_amylovora   | Stormwater | Urban |
| Bacteria_Proteobacteria_Gammaproteobacteria_Enterobacteriales_Enterobacteriaceae_Pantoea             | Stormwater | Urban |
| Bacteria_Proteobacteria_Gammaproteobacteria_Enterobacteriales_Enterobacteriaceae_Pantoea_agglomerans | Stormwater | Urban |
| Bacteria_Proteobacteria_Gammaproteobacteria_Oceanospirillales_Halomonadaceae_Halomonas               | Stormwater | Urban |
| Bacteria_Proteobacteria_Gammaproteobacteria_Pseudomonadales_Moraxellaceae_Alkanindiges_illinoisensis | Stormwater | Urban |
| Bacteria_Proteobacteria_Gammaproteobacteria_Pseudomonadales_Moraxellaceae_Enhydrobacter              | Stormwater | Urban |
| Bacteria_Proteobacteria_Gammaproteobacteria_Pseudomonadales_Pseudomonadaceae_Cellvibrio              | Stormwater | Urban |
| Bacteria_Proteobacteria_Gammaproteobacteria_Pseudomonadales_Pseudomonadaceae_Cellvibrio_japonicus    | Stormwater | Urban |
| Bacteria_Proteobacteria_Gammaproteobacteria_Pseudomonadales_Pseudomonadaceae_Pseudomonas             | Stormwater | Urban |
| Bacteria_Proteobacteria_Gammaproteobacteria_Xanthomonadales_Xanthomonadaceae                         | Stormwater | Urban |
| Bacteria_Proteobacteria_Gammaproteobacteria_Xanthomonadales_Xanthomonadaceae_Stenotrophomonas        | Stormwater | Urban |
| Bacteria_TM7                                                                                         | Stormwater | Urban |
| Bacteria_Actinobacteria_Actinobacteria_Actinomycetales_Actinomycetaceae_Actinomyces                  | Sewage     | Urban |
| Bacteria_Actinobacteria_Actinobacteria_Actinomycetales_Corynebacteriaceae_Corynebacterium            | Sewage     | Urban |
| Bacteria_Actinobacteria_Actinobacteria_Actinomycetales_Dermacoccaceae_Dermacoccus                    | Sewage     | Urban |
| Bacteria_Actinobacteria_Actinobacteria_Actinomycetales_Propionibacteriaceae_Tessaracoccus            | Sewage     | Urban |
| Bacteria_Actinobacteria_Actinobacteria_Actinomycetales_Sanguibacteraceae_Sanguibacter                | Sewage     | Urban |
| Bacteria_Actinobacteria_Actinobacteria_Bifidobacteriales_Bifidobacteriaceae_Bifidobacterium          | Sewage     | Urban |
| Bacteria_Actinobacteria_Actinobacteria_Coriobacteriales_Coriobacteriaceae_Collinsella                | Sewage     | Urban |
| Bacteria_Bacteroidetes_Bacteroidia_Bacteroidales                                                     | Sewage     | Urban |

|                                                                                         |        |       |
|-----------------------------------------------------------------------------------------|--------|-------|
| Bacteria_Bacteroidetes_Bacteroidia_Bacteroidales_Bacteroidaceae_Bacteroides             | Sewage | Urban |
| Bacteria_Bacteroidetes_Bacteroidia_Bacteroidales_Marinilabiaceae                        | Sewage | Urban |
| Bacteria_Bacteroidetes_Bacteroidia_Bacteroidales_Marinilabiaceae_Alkaliflexus           | Sewage | Urban |
| Bacteria_Bacteroidetes_Bacteroidia_Bacteroidales_Porphyrromonadaceae_Barnesiella        | Sewage | Urban |
| Bacteria_Bacteroidetes_Bacteroidia_Bacteroidales_Porphyrromonadaceae_Dysgonomonas       | Sewage | Urban |
| Bacteria_Bacteroidetes_Bacteroidia_Bacteroidales_Porphyrromonadaceae_Paludibacter       | Sewage | Urban |
| Bacteria_Bacteroidetes_Bacteroidia_Bacteroidales_Porphyrromonadaceae_Parabacteroides    | Sewage | Urban |
| Bacteria_Bacteroidetes_Bacteroidia_Bacteroidales_Prevotellaceae_Prevotella              | Sewage | Urban |
| Bacteria_Bacteroidetes_Bacteroidia_Bacteroidales_Rikenellaceae                          | Sewage | Urban |
| Bacteria_Bacteroidetes_Bacteroidia_Bacteroidales_Rikenellaceae_Alistipes                | Sewage | Urban |
| Bacteria_Bacteroidetes_Flavobacteria_Flavobacteriales_Flavobacteriaceae_Cloacibacterium | Sewage | Urban |
| Bacteria_Bacteroidetes_Flavobacteria_Flavobacteriales_Flavobacteriaceae_Empedobacter    | Sewage | Urban |
| Bacteria_Bacteroidetes_Flavobacteria_Flavobacteriales_Flavobacteriaceae_Lutibacter      | Sewage | Urban |
| Bacteria_Firmicutes_Bacilli_Lactobacillales                                             | Sewage | Urban |
| Bacteria_Firmicutes_Bacilli_Lactobacillales_Carnobacteriaceae_Trichococcus              | Sewage | Urban |
| Bacteria_Firmicutes_Bacilli_Lactobacillales_Enterococcaceae_Enterococcus                | Sewage | Urban |
| Bacteria_Firmicutes_Bacilli_Lactobacillales_Lactobacillaceae_Lactobacillus              | Sewage | Urban |
| Bacteria_Firmicutes_Bacilli_Lactobacillales_Streptococcaceae_Lactococcus                | Sewage | Urban |
| Bacteria_Firmicutes_Bacilli_Lactobacillales_Streptococcaceae_Streptococcus              | Sewage | Urban |
| Bacteria_Firmicutes_Clostridia_Clostridiales_Clostridiaceae_Clostridium                 | Sewage | Urban |
| Bacteria_Firmicutes_Clostridia_Clostridiales_Eubacteriaceae_Acetobacterium              | Sewage | Urban |
| Bacteria_Firmicutes_Clostridia_Clostridiales_Lachnospiraceae                            | Sewage | Urban |
| Bacteria_Firmicutes_Clostridia_Clostridiales_Lachnospiraceae_Blautia                    | Sewage | Urban |
| Bacteria_Firmicutes_Clostridia_Clostridiales_Lachnospiraceae_Coproccoccus               | Sewage | Urban |
| Bacteria_Firmicutes_Clostridia_Clostridiales_Lachnospiraceae_Dorea                      | Sewage | Urban |
| Bacteria_Firmicutes_Clostridia_Clostridiales_Lachnospiraceae_Roseburia                  | Sewage | Urban |
| Bacteria_Firmicutes_Clostridia_Clostridiales_Peptostreptococcaceae                      | Sewage | Urban |
| Bacteria_Firmicutes_Clostridia_Clostridiales_Peptostreptococcaceae_Fusibacter           | Sewage | Urban |

|                                                                                                     |        |       |
|-----------------------------------------------------------------------------------------------------|--------|-------|
| Bacteria_Firmicutes_Clostridia_Clostridiales_Ruminococcaceae                                        | Sewage | Urban |
| Bacteria_Firmicutes_Clostridia_Clostridiales_Ruminococcaceae_Acetivibrio                            | Sewage | Urban |
| Bacteria_Firmicutes_Clostridia_Clostridiales_Ruminococcaceae_Oscillibacter                          | Sewage | Urban |
| Bacteria_Firmicutes_Clostridia_Clostridiales_Ruminococcaceae_Ruminococcus                           | Sewage | Urban |
| Bacteria_Firmicutes_Clostridia_Clostridiales_Ruminococcaceae_Subdoligranulum                        | Sewage | Urban |
| Bacteria_Firmicutes_Clostridia_Clostridiales_Unassigned_Anaerovorax                                 | Sewage | Urban |
| Bacteria_Firmicutes_Clostridia_Clostridiales_Veillonellaceae                                        | Sewage | Urban |
| Bacteria_Firmicutes_Clostridia_Clostridiales_Veillonellaceae_Anaerospora                            | Sewage | Urban |
| Bacteria_Firmicutes_Clostridia_Clostridiales_Veillonellaceae_Sporomusa_acidovorans                  | Sewage | Urban |
| Bacteria_Firmicutes_Clostridia_Clostridiales_Veillonellaceae_Veillonella                            | Sewage | Urban |
| Bacteria_Firmicutes_Clostridia_Clostridiales_Veillonellaceae_Zymophilus                             | Sewage | Urban |
| Bacteria_Firmicutes_Erysipelotrichi_Erysipelotrichales_Erysipelotrichaceae                          | Sewage | Urban |
| Bacteria_Firmicutes_Erysipelotrichi_Erysipelotrichales_Erysipelotrichaceae_Coprobacillus            | Sewage | Urban |
| Bacteria_Fusobacteria_Fusobacteria_Fusobacteriales_Fusobacteriaceae_Fusobacterium                   | Sewage | Urban |
| Bacteria_Fusobacteria_Fusobacteria_Fusobacteriales_Leptotrichiaceae                                 | Sewage | Urban |
| Bacteria_Proteobacteria_Betaproteobacteria                                                          | Sewage | Urban |
| Bacteria_Proteobacteria_Betaproteobacteria_Burkholderiales_Comamonadaceae_Acidovorax                | Sewage | Urban |
| Bacteria_Proteobacteria_Betaproteobacteria_Burkholderiales_Comamonadaceae_Simplicispira             | Sewage | Urban |
| Bacteria_Proteobacteria_Betaproteobacteria_Burkholderiales_Oxalobacteraceae_Janthinobacterium       | Sewage | Urban |
| Bacteria_Proteobacteria_Betaproteobacteria_Nitrosomonadales_Gallionellaceae                         | Sewage | Urban |
| Bacteria_Proteobacteria_Betaproteobacteria_Rhodocyclales_Rhodocyclaceae_Dechloromonas               | Sewage | Urban |
| Bacteria_Proteobacteria_Betaproteobacteria_Rhodocyclales_Rhodocyclaceae_Ferribacterium              | Sewage | Urban |
| Bacteria_Proteobacteria_Betaproteobacteria_Rhodocyclales_Rhodocyclaceae_Propionivibrio              | Sewage | Urban |
| Bacteria_Proteobacteria_Betaproteobacteria_Rhodocyclales_Rhodocyclaceae_Thauera                     | Sewage | Urban |
| Bacteria_Proteobacteria_Betaproteobacteria_Rhodocyclales_Rhodocyclaceae_Zoogloea                    | Sewage | Urban |
| Bacteria_Proteobacteria_Deltaproteobacteria_Desulfovibrionales_Desulfomicrobiaceae_Desulfomicrobium | Sewage | Urban |
| Bacteria_Proteobacteria_Deltaproteobacteria_Desulfovibrionales_Desulfovibrionaceae_Desulfovibrio    | Sewage | Urban |
| Bacteria_Proteobacteria_Epsilonproteobacteria_Campylobacteriales_Campylobacteraceae_Arcobacter      | Sewage | Urban |

|                                                                                                               |        |         |
|---------------------------------------------------------------------------------------------------------------|--------|---------|
| Bacteria_Proteobacteria_Epsilonproteobacteria_Campylobacterales_Campylobacteraceae_Sulfurospirillum           | Sewage | Urban   |
| Bacteria_Proteobacteria_Epsilonproteobacteria_Campylobacterales_Helicobacteraceae                             | Sewage | Urban   |
| Bacteria_Proteobacteria_Gammaproteobacteria_Aeromonadales_Aeromonadaceae_Aeromonas                            | Sewage | Urban   |
| Bacteria_Proteobacteria_Gammaproteobacteria_Aeromonadales_Aeromonadaceae_Tolomonas                            | Sewage | Urban   |
| Bacteria_Proteobacteria_Gammaproteobacteria_Enterobacteriales_Enterobacteriaceae_Klebsiella                   | Sewage | Urban   |
| Bacteria_Proteobacteria_Gammaproteobacteria_Enterobacteriales_Enterobacteriaceae_Yersinia                     | Sewage | Urban   |
| Bacteria_Proteobacteria_Gammaproteobacteria_Pseudomonadales_Moraxellaceae_Acinetobacter                       | Sewage | Urban   |
| Bacteria_Proteobacteria_Gammaproteobacteria_Pseudomonadales_Moraxellaceae_Alkanindiges                        | Sewage | Urban   |
| Bacteria_Proteobacteria_Gammaproteobacteria_Pseudomonadales_Moraxellaceae_Psychrobacter                       | Sewage | Urban   |
| Bacteria_Tenericutes_Mollicutes                                                                               | Sewage | Urban   |
| Bacteria_Actinobacteria_Actinobacteria_Actinomycetales_Beutenbergiaceae_Beutenbergia_cavernae                 |        | Urban   |
| Bacteria_Actinobacteria_Actinobacteria_Actinomycetales_Micrococcaceae_Arthrobacter_cumminsii                  |        | Urban   |
| Bacteria_Firmicutes_Clostridia_Clostridiales_Veillonellaceae_Dendrosporobacter                                |        | Urban   |
| Bacteria_Firmicutes_Clostridia_Clostridiales_Veillonellaceae_Veillonella_dispar                               |        | Urban   |
| Bacteria_Proteobacteria_Deltaproteobacteria_Desulfobacteriales_Desulfobulbaceae_Desulforhopalus_singaporensis |        | Urban   |
| Bacteria_Proteobacteria_Betaproteobacteria_Burkholderiales_Comamonadaceae_Polaromonas                         | Sewage | Aquatic |
| Bacteria_Actinobacteria_Actinobacteria_Actinomycetales_Microbacteriaceae                                      | River  | Aquatic |
| Bacteria_Actinobacteria_Actinobacteria_Actinomycetales_Microbacteriaceae_Rhodoluna                            | River  | Aquatic |
| Bacteria_Bacteroidetes_Sphingobacteria_Sphingobacteriales_Chitinophagaceae_Lacibacter_cauensis                | River  | Aquatic |
| Bacteria_Bacteroidetes_Sphingobacteria_Sphingobacteriales_Cytophagaceae_Arcicella                             | River  | Aquatic |
| Bacteria_Bacteroidetes_Sphingobacteria_Sphingobacteriales_Cytophagaceae_Emticicia                             | River  | Aquatic |
| Bacteria_Bacteroidetes_Sphingobacteria_Sphingobacteriales_Cytophagaceae_Flectobacillus_lacus                  | River  | Aquatic |
| Bacteria_Cyanobacteria_Cyanobacteria_SubsectionIII_Unassigned_Planktothrix                                    | River  | Aquatic |
| Bacteria_Proteobacteria_Alphaproteobacteria_Rhizobiales_Unassigned_Nordella                                   | River  | Aquatic |
| Bacteria_Proteobacteria_Alphaproteobacteria_Rhodobacterales_Rhodobacteraceae_Rhodobacter                      | River  | Aquatic |
| Bacteria_Proteobacteria_Betaproteobacteria_Burkholderiales_Alcaligenaceae_Derxia                              | River  | Aquatic |
| Bacteria_Proteobacteria_Betaproteobacteria_Burkholderiales_Burkholderiaceae_Polynucleobacter_cosmopolitanus   | River  | Aquatic |
| Bacteria_Proteobacteria_Betaproteobacteria_Burkholderiales_Comamonadaceae_Rhodoferax                          | River  | Aquatic |



|                                                                                                       |        |         |
|-------------------------------------------------------------------------------------------------------|--------|---------|
| Bacteria_Proteobacteria_Betaproteobacteria_Burkholderiales_Oxalobacteraceae_Paucimonas                | River  | Aquatic |
| Bacteria_Proteobacteria_Betaproteobacteria_Methylophilales_Methylophilaceae_Methylotenera             | River  | Aquatic |
| Bacteria_Proteobacteria_Gammaproteobacteria_Methylococcales_Methylococcaceae                          | River  | Aquatic |
| Bacteria_Proteobacteria_Gammaproteobacteria_Methylococcales_Methylococcaceae_Methylococcus_capsulatus | River  | Aquatic |
| Bacteria_Proteobacteria_Gammaproteobacteria_Methylococcales_Methylococcaceae_Methylomicrobium         | River  | Aquatic |
| Bacteria_Actinobacteria_Actinobacteria_Acidimicrobiales_Acidimicrobiaceae                             | Lake   | Aquatic |
| Bacteria_Actinobacteria_Actinobacteria_Actinomycetales_Sporichthyaceae                                | Lake   | Aquatic |
| Bacteria_Bacteroidetes_Flavobacteria_Flavobacteriales_Cryomorphaceae_Fluviicola                       | Lake   | Aquatic |
| Bacteria_Bacteroidetes_Flavobacteria_Flavobacteriales_Flavobacteriaceae_Flavobacterium                | Lake   | Aquatic |
| Bacteria_Bacteroidetes_Sphingobacteria_Sphingobacteriales_Chitinophagaceae                            | Lake   | Aquatic |
| Bacteria_Bacteroidetes_Sphingobacteria_Sphingobacteriales_Chitinophagaceae_Ferruginibacter            | Lake   | Aquatic |
| Bacteria_Bacteroidetes_Sphingobacteria_Sphingobacteriales_Cyclobacteriaceae_Algoriphagus              | Lake   | Aquatic |
| Bacteria_Bacteroidetes_Sphingobacteria_Sphingobacteriales_Saprospiraceae_Lewinella_antarctica         | Lake   | Aquatic |
| Bacteria_Chloroflexi                                                                                  | Lake   | Aquatic |
| Bacteria_Cyanobacteria_Cyanobacteria_SubsectionI_Unassigned                                           | Lake   | Aquatic |
| Bacteria_Cyanobacteria_Cyanobacteria_SubsectionI_Unassigned_Synechococcus                             | Lake   | Aquatic |
| Bacteria_Planctomycetes_Phycisphaerae_Phycisphaerales_Phycisphaeraceae                                | Lake   | Aquatic |
| Bacteria_Proteobacteria_Alphaproteobacteria_Rhizobiales_Beijerinckiaceae_Methylocella                 | Lake   | Aquatic |
| Bacteria_Proteobacteria_Alphaproteobacteria_Rickettsiales_SAR11_Pelagibacter                          | Lake   | Aquatic |
| Bacteria_Proteobacteria_Alphaproteobacteria_Sphingomonadales_Sphingomonadaceae_Sphingopyxis           | Lake   | Aquatic |
| Bacteria_Proteobacteria_Betaproteobacteria_Burkholderiales_Alcaligenaceae                             | Lake   | Aquatic |
| Bacteria_Proteobacteria_Gammaproteobacteria_Methylococcales_Methylococcaceae_Methylomonas_fodinarum   | Lake   | Aquatic |
| Bacteria_Verrucomicrobia_Opitutae_Opitutales_Opitutaceae_Opitutus                                     | Lake   | Aquatic |
| Bacteria_Verrucomicrobia_Verrucomicrobiae_Verrucomicrobiales_Verrucomicrobiaceae_Acidimethylosilex    | Lake   | Aquatic |
| Bacteria_Verrucomicrobia_Verrucomicrobiae_Verrucomicrobiales_Verrucomicrobiaceae_Luteolibacter        | Lake   | Aquatic |
| Bacteria_Actinobacteria_Actinobacteria_Actinomycetales_Microbacteriaceae_Aquiluna                     | Harbor | Aquatic |
| Bacteria_Actinobacteria_Actinobacteria_Actinomycetales_Microbacteriaceae_Planktoluna                  | Harbor | Aquatic |
| Bacteria_Actinobacteria_Actinobacteria_Actinomycetales_Sporichthyaceae_Planktophila                   | Harbor | Aquatic |

|                                                                                                  |        |         |
|--------------------------------------------------------------------------------------------------|--------|---------|
| Bacteria_Bacteroidetes                                                                           | Harbor | Aquatic |
| Bacteria_Bacteroidetes_Flavobacteria_Flavobacteriales                                            | Harbor | Aquatic |
| Bacteria_Bacteroidetes_Flavobacteria_Flavobacteriales_Cryomorphaceae_Fluviicola_taffensis        | Harbor | Aquatic |
| Bacteria_Bacteroidetes_Flavobacteria_Flavobacteriales_Cryomorphaceae_Owenweeksia                 | Harbor | Aquatic |
| Bacteria_Bacteroidetes_Sphingobacteria_Sphingobacteriales                                        | Harbor | Aquatic |
| Bacteria_Bacteroidetes_Sphingobacteria_Sphingobacteriales_Chitinophagaceae_Sediminibacterium     | Harbor | Aquatic |
| Bacteria_Bacteroidetes_Sphingobacteria_Sphingobacteriales_Cytophagaceae_Leadbetterella           | Harbor | Aquatic |
| Bacteria_Bacteroidetes_Sphingobacteria_Sphingobacteriales_Saprospiraceae_Aquirestis              | Harbor | Aquatic |
| Bacteria_Bacteroidetes_Sphingobacteria_Sphingobacteriales_Saprospiraceae_Saprospira              | Harbor | Aquatic |
| Bacteria_Bacteroidetes_Sphingobacteria_Sphingobacteriales_Sphingobacteriaceae                    | Harbor | Aquatic |
| Bacteria_Cyanobacteria_Cyanobacteria_SubsectionIII_Unassigned                                    | Harbor | Aquatic |
| Bacteria_Cyanobacteria_Cyanobacteria_SubsectionIII_Unassigned_Prochlorothrix                     | Harbor | Aquatic |
| Bacteria_Proteobacteria_Alphaproteobacteria_Rhizobiales_Beijerinckiaceae                         | Harbor | Aquatic |
| Bacteria_Proteobacteria_Alphaproteobacteria_Rhizobiales_Methylocystaceae_Methylocystis           | Harbor | Aquatic |
| Bacteria_Proteobacteria_Betaproteobacteria_Burkholderiales_Burkholderiaceae_Polynucleobacter     | Harbor | Aquatic |
| Bacteria_Proteobacteria_Betaproteobacteria_Burkholderiales_Comamonadaceae_Curvibacter            | Harbor | Aquatic |
| Bacteria_Proteobacteria_Betaproteobacteria_Burkholderiales_Comamonadaceae_Hydrogenophaga         | Harbor | Aquatic |
| Bacteria_Proteobacteria_Betaproteobacteria_Methylophilales_Methylophilaceae                      | Harbor | Aquatic |
| Bacteria_Proteobacteria_Betaproteobacteria_Rhodocyclales_Rhodocyclaceae_Methyloversatilis        | Harbor | Aquatic |
| Bacteria_Proteobacteria_Deltaproteobacteria_Bdellovibrionales_Bdellovibrionaceae                 | Harbor | Aquatic |
| Bacteria_Proteobacteria_Gammaproteobacteria_Chromatiales_Ectothiorhodospiraceae_Thiorhodospira   | Harbor | Aquatic |
| Bacteria_Proteobacteria_Gammaproteobacteria_Enterobacteriales_Enterobacteriaceae_Sodalis         | Harbor | Aquatic |
| Bacteria_Proteobacteria_Gammaproteobacteria_Methylococcales_Methylococcaceae_Methylocaldum       | Harbor | Aquatic |
| Bacteria_Proteobacteria_Gammaproteobacteria_Oceanospirillales_Oceanospirillaceae_Pseudospirillum | Harbor | Aquatic |
| Bacteria_Proteobacteria_Gammaproteobacteria_Xanthomonadales_Xanthomonadaceae_Arenimonas          | Harbor | Aquatic |
| Bacteria_Verrucomicrobia_Opitutae_Puniceicoccales_Puniceicoccaceae                               | Harbor | Aquatic |
| Bacteria_Verrucomicrobia_Spartobacteria                                                          | Harbor | Aquatic |
| Bacteria_Verrucomicrobia_Verrucomicrobiae_Verrucomicrobiales_Subdivision3                        | Harbor | Aquatic |

|                                                                                                            |            |         |
|------------------------------------------------------------------------------------------------------------|------------|---------|
| Bacteria_Verrucomicrobia_Verrucomicrobiae_Verrucomicrobiales_Verrucomicrobiaceae                           | Harbor     | Aquatic |
| Bacteria_Verrucomicrobia_Verrucomicrobiae_Verrucomicrobiales_Verrucomicrobiaceae_Haloferula                | Harbor     | Aquatic |
| Bacteria_Verrucomicrobia_Verrucomicrobiae_Verrucomicrobiales_Verrucomicrobiaceae_Prostheco bacter          | Harbor     | Aquatic |
| Bacteria_Verrucomicrobia_Verrucomicrobiae_Verrucomicrobiales_Verrucomicrobiaceae_Prostheco bacter_debontii | Harbor     | Aquatic |
| Bacteria_Cyanobacteria_Cyanobacteria_SubsectionIV                                                          |            | Aquatic |
| Bacteria_Proteobacteria_Betaproteobacteria_Burkholderiales_Burkholderiaceae                                |            | Aquatic |
| Bacteria                                                                                                   | Stormwater |         |
| Bacteria_Acidobacteria_Acidobacteria_Acidobacteriales_Acidobacteriaceae                                    | Stormwater |         |
| Bacteria_Acidobacteria_Acidobacteria_Acidobacteriales_Acidobacteriaceae_Chloroacidobacterium               | Stormwater |         |
| Bacteria_Actinobacteria_Actinobacteria_Acidimicrobiales_Iamiaceae_Iamia                                    | Stormwater |         |
| Bacteria_Actinobacteria_Actinobacteria_Actinomycetales_Brevibacteriaceae_Brevibacterium                    | Stormwater |         |
| Bacteria_Actinobacteria_Actinobacteria_Actinomycetales_Cellulomonadaceae_Actinotalea                       | Stormwater |         |
| Bacteria_Actinobacteria_Actinobacteria_Actinomycetales_Dietziaceae_Dietzia                                 | Stormwater |         |
| Bacteria_Actinobacteria_Actinobacteria_Actinomycetales_Geodermatophilaceae                                 | Stormwater |         |
| Bacteria_Actinobacteria_Actinobacteria_Actinomycetales_Intrasporangiaceae_Knoellia                         | Stormwater |         |
| Bacteria_Actinobacteria_Actinobacteria_Actinomycetales_Microbacteriaceae_Rathayibacter                     | Stormwater |         |
| Bacteria_Actinobacteria_Actinobacteria_Actinomycetales_Micrococcaceae_Kocuria                              | Stormwater |         |
| Bacteria_Actinobacteria_Actinobacteria_Actinomycetales_Micromonosporaceae                                  | Stormwater |         |
| Bacteria_Actinobacteria_Actinobacteria_Actinomycetales_Micromonosporaceae_Actinoplanes                     | Stormwater |         |
| Bacteria_Actinobacteria_Actinobacteria_Actinomycetales_Micromonosporaceae_Micromonospora                   | Stormwater |         |
| Bacteria_Actinobacteria_Actinobacteria_Actinomycetales_Nocardoidaceae_Aeromicrobium                        | Stormwater |         |
| Bacteria_Actinobacteria_Actinobacteria_Nitriliruptorales_Nitriliruptoraceae_Nitriliruptor                  | Stormwater |         |
| Bacteria_Actinobacteria_Actinobacteria_Solirubrobacterales_Conexibacteraceae_Conexibacter                  | Stormwater |         |
| Bacteria_Actinobacteria_Actinobacteria_Solirubrobacterales_Solirubrobacteraceae_Solirubrobacter            | Stormwater |         |
| Bacteria_Bacteroidetes_Bacteroidia_Bacteroidales_Porphyrimonadaceae_Symbiothrix                            | Stormwater |         |
| Bacteria_Bacteroidetes_Flavobacteria_Flavobacteriales_Flavobacteriaceae_Gillisia                           | Stormwater |         |
| Bacteria_Bacteroidetes_Flavobacteria_Flavobacteriales_Flavobacteriaceae_Tenacibaculum                      | Stormwater |         |
| Bacteria_Bacteroidetes_Flavobacteria_Flavobacteriales_Flavobacteriaceae_Wautersiella                       | Stormwater |         |

|                                                                                                                  |            |
|------------------------------------------------------------------------------------------------------------------|------------|
| Bacteria_Bacteroidetes_Sphingobacteria_Sphingobacteriales_Chitinophagaceae_Chitinophaga                          | Stormwater |
| Bacteria_Bacteroidetes_Sphingobacteria_Sphingobacteriales_Chitinophagaceae_Flavisolibacter                       | Stormwater |
| Bacteria_Bacteroidetes_Sphingobacteria_Sphingobacteriales_Chitinophagaceae_Niastella                             | Stormwater |
| Bacteria_Bacteroidetes_Sphingobacteria_Sphingobacteriales_Chitinophagaceae_Segetibacter                          | Stormwater |
| Bacteria_Bacteroidetes_Sphingobacteria_Sphingobacteriales_Chitinophagaceae_Terrimonas                            | Stormwater |
| Bacteria_Bacteroidetes_Sphingobacteria_Sphingobacteriales_Cyclobacteriaceae                                      | Stormwater |
| Bacteria_Bacteroidetes_Sphingobacteria_Sphingobacteriales_Cytophagaceae                                          | Stormwater |
| Bacteria_Bacteroidetes_Sphingobacteria_Sphingobacteriales_Cytophagaceae_Adhaeribacter                            | Stormwater |
| Bacteria_Bacteroidetes_Sphingobacteria_Sphingobacteriales_Cytophagaceae_Spirosoma                                | Stormwater |
| Bacteria_Bacteroidetes_Sphingobacteria_Sphingobacteriales_Sphingobacteriaceae_Sphingobacteriaceae                | Stormwater |
| Bacteria_Bacteroidetes_Sphingobacteria_Sphingobacteriales_Sphingobacteriaceae_Sphingobacteriaceae_Mucilagibacter | Stormwater |
| Bacteria_Bacteroidetes_Sphingobacteria_Sphingobacteriales_Sphingobacteriaceae_Sphingobacteriaceae_Pedobacter     | Stormwater |
| Bacteria_BRC1                                                                                                    | Stormwater |
| Bacteria_Chlamydiae_Chlamydiae_Chlamydiales                                                                      | Stormwater |
| Bacteria_Chlamydiae_Chlamydiae_Chlamydiales_Simkaniaceae_Rhabdochlamydia                                         | Stormwater |
| Bacteria_Chloroflexi_Anaerolineae_Anaerolineales_Anaerolineaceae                                                 | Stormwater |
| Bacteria_Chloroflexi_Chloroflexi_Herpetosiphonales_Herpetosiphonaceae_Herpetosiphon_aurantiacus                  | Stormwater |
| Bacteria_Cyanobacteria_Cyanobacteria_SubsectionII_SubgroupII_Pleurocapsa                                         | Stormwater |
| Bacteria_Cyanobacteria_Cyanobacteria_SubsectionIII                                                               | Stormwater |
| Bacteria_Cyanobacteria_Cyanobacteria_SubsectionIV_Unassigned_Nostoc                                              | Stormwater |
| Bacteria_Deinococcus_Thermus_Deinococci_Deinococcales_Deinococcaceae_Deinococcus                                 | Stormwater |
| Bacteria_Fibrobacteres_Fibrobacteria_Fibrobacterales_Fibrobacteraceae                                            | Stormwater |
| Bacteria_Firmicutes_Bacilli_Bacillales_Bacillaceae_Terribacillus                                                 | Stormwater |
| Bacteria_Firmicutes_Bacilli_Bacillales_Planococcaceae                                                            | Stormwater |
| Bacteria_Firmicutes_Bacilli_Bacillales_Unassigned_Exiguobacterium_sibiricum                                      | Stormwater |
| Bacteria_Firmicutes_Clostridia_Clostridiales                                                                     | Stormwater |
| Bacteria_Firmicutes_Clostridia_Clostridiales_Lachnospiraceae_Anaerosporobacter                                   | Stormwater |
| Bacteria_Gemmatimonadetes_Gemmatimonadetes                                                                       | Stormwater |

|                                                                                                             |            |
|-------------------------------------------------------------------------------------------------------------|------------|
| Bacteria_Gemmatimonadetes_Gemmatimonadetes_Gemmatimonadales_Gemmatimonadaceae_Gemmatimonas                  | Stormwater |
| Bacteria_Nitrospirae_Nitrospira_Nitrospirales_Nitrospiraceae_Nitrospira                                     | Stormwater |
| Bacteria_OP10                                                                                               | Stormwater |
| Bacteria_OP3                                                                                                | Stormwater |
| Bacteria_Planctomycetes_Planctomycetacia_Planctomycetales_Planctomycetaceae                                 | Stormwater |
| Bacteria_Proteobacteria_Alphaproteobacteria_Caulobacterales_Caulobacteraceae                                | Stormwater |
| Bacteria_Proteobacteria_Alphaproteobacteria_Caulobacterales_Caulobacteraceae_Asticcacaulis                  | Stormwater |
| Bacteria_Proteobacteria_Alphaproteobacteria_Caulobacterales_Caulobacteraceae_Phenylobacterium               | Stormwater |
| Bacteria_Proteobacteria_Alphaproteobacteria_Caulobacterales_Hyphomonadaceae                                 | Stormwater |
| Bacteria_Proteobacteria_Alphaproteobacteria_Rhizobiales_Bradyrhizobiaceae                                   | Stormwater |
| Bacteria_Proteobacteria_Alphaproteobacteria_Rhizobiales_Bradyrhizobiaceae_Balneimonas                       | Stormwater |
| Bacteria_Proteobacteria_Alphaproteobacteria_Rhizobiales_Bradyrhizobiaceae_Bradyrhizobium                    | Stormwater |
| Bacteria_Proteobacteria_Alphaproteobacteria_Rhizobiales_Hyphomicrobiaceae                                   | Stormwater |
| Bacteria_Proteobacteria_Alphaproteobacteria_Rhizobiales_Hyphomicrobiaceae_Prosthecomicrobium                | Stormwater |
| Bacteria_Proteobacteria_Alphaproteobacteria_Rhizobiales_Methylobacteriaceae_Methylobacterium                | Stormwater |
| Bacteria_Proteobacteria_Alphaproteobacteria_Rhizobiales_Methylocystaceae                                    | Stormwater |
| Bacteria_Proteobacteria_Alphaproteobacteria_Rhizobiales_Rhodobiaceae_Rhodobium                              | Stormwater |
| Bacteria_Proteobacteria_Alphaproteobacteria_Rhizobiales_Xanthobacteraceae                                   | Stormwater |
| Bacteria_Proteobacteria_Alphaproteobacteria_Rhizobiales_Xanthobacteraceae_Pseudolabrys                      | Stormwater |
| Bacteria_Proteobacteria_Alphaproteobacteria_Rhodobacterales_Rhodobacteraceae_Seohaecicola                   | Stormwater |
| Bacteria_Proteobacteria_Alphaproteobacteria_Rhodospirillales_Acetobacteraceae                               | Stormwater |
| Bacteria_Proteobacteria_Alphaproteobacteria_Rhodospirillales_Acetobacteraceae_Roseococcus                   | Stormwater |
| Bacteria_Proteobacteria_Alphaproteobacteria_Rhodospirillales_Acetobacteraceae_Roseomonas                    | Stormwater |
| Bacteria_Proteobacteria_Alphaproteobacteria_Rhodospirillales_Rhodospirillaceae_Defluviococcus               | Stormwater |
| Bacteria_Proteobacteria_Alphaproteobacteria_Rhodospirillales_Rhodospirillaceae_Insolitispirillum_peregrinum | Stormwater |
| Bacteria_Proteobacteria_Alphaproteobacteria_Rickettsiales                                                   | Stormwater |
| Bacteria_Proteobacteria_Alphaproteobacteria_Rickettsiales_Holosporaceae_Holospora                           | Stormwater |
| Bacteria_Proteobacteria_Alphaproteobacteria_Rickettsiales_Unassigned_Caediabacter                           | Stormwater |

|                                                                                                    |            |
|----------------------------------------------------------------------------------------------------|------------|
| Bacteria_Proteobacteria_Alphaproteobacteria_Sphingomonadales_Erythrobacteraceae                    | Stormwater |
| Bacteria_Proteobacteria_Alphaproteobacteria_Sphingomonadales_Erythrobacteraceae_Altererythrobacter | Stormwater |
| Bacteria_Proteobacteria_Alphaproteobacteria_Sphingomonadales_Erythrobacteraceae_Erythrobacter      | Stormwater |
| Bacteria_Proteobacteria_Alphaproteobacteria_Sphingomonadales_Sphingomonadaceae_Sphingomonas        | Stormwater |
| Bacteria_Proteobacteria_Betaproteobacteria_Burkholderiales                                         | Stormwater |
| Bacteria_Proteobacteria_Betaproteobacteria_Burkholderiales_Burkholderiaceae_Limnobacter            | Stormwater |
| Bacteria_Proteobacteria_Betaproteobacteria_Burkholderiales_Comamonadaceae_Azohydromonas            | Stormwater |
| Bacteria_Proteobacteria_Betaproteobacteria_Burkholderiales_Comamonadaceae_Leptothrix               | Stormwater |
| Bacteria_Proteobacteria_Betaproteobacteria_Burkholderiales_Comamonadaceae_Malikia                  | Stormwater |
| Bacteria_Proteobacteria_Betaproteobacteria_Burkholderiales_Comamonadaceae_Ottowia                  | Stormwater |
| Bacteria_Proteobacteria_Betaproteobacteria_Burkholderiales_Oxalobacteraceae_Duganella_zoogloeoides | Stormwater |
| Bacteria_Proteobacteria_Betaproteobacteria_Burkholderiales_Oxalobacteraceae_Naxibacter             | Stormwater |
| Bacteria_Proteobacteria_Betaproteobacteria_Burkholderiales_Oxalobacteraceae_Oxalicibacterium_horti | Stormwater |
| Bacteria_Proteobacteria_Betaproteobacteria_Burkholderiales_Oxalobacteraceae_Undibacterium          | Stormwater |
| Bacteria_Proteobacteria_Betaproteobacteria_Hydrogenophilales_Hydrogenophilaceae_Thiobacillus       | Stormwater |
| Bacteria_Proteobacteria_Betaproteobacteria_Methylophilales_Methylophilaceae_Methylophilus          | Stormwater |
| Bacteria_Proteobacteria_Betaproteobacteria_Methylophilales_Methylophilaceae_Methylovorus           | Stormwater |
| Bacteria_Proteobacteria_Betaproteobacteria_Neisseriales_Neisseriaceae                              | Stormwater |
| Bacteria_Proteobacteria_Betaproteobacteria_Nitrosomonadales_Nitrosomonadaceae                      | Stormwater |
| Bacteria_Proteobacteria_Betaproteobacteria_Rhodocyclales_Rhodocyclaceae_Azospira                   | Stormwater |
| Bacteria_Proteobacteria_Betaproteobacteria_Rhodocyclales_Rhodocyclaceae_Ferribacterium_limneticum  | Stormwater |
| Bacteria_Proteobacteria_Deltaproteobacteria                                                        | Stormwater |
| Bacteria_Proteobacteria_Deltaproteobacteria_Bdellovibrionales_Bacteriovoraceae_Peredibacter        | Stormwater |
| Bacteria_Proteobacteria_Deltaproteobacteria_Desulfuromonadales_Desulfuromonadaceae_Desulfuromonas  | Stormwater |
| Bacteria_Proteobacteria_Deltaproteobacteria_Desulfuromonadales_Geobacteraceae_Geobacter            | Stormwater |
| Bacteria_Proteobacteria_Deltaproteobacteria_Myxococcales                                           | Stormwater |
| Bacteria_Proteobacteria_Deltaproteobacteria_Myxococcales_Cystobacteraceae_Anaeromyxobacter         | Stormwater |
| Bacteria_Proteobacteria_Deltaproteobacteria_Myxococcales_Polyangiaceae                             | Stormwater |

|                                                                                                       |            |
|-------------------------------------------------------------------------------------------------------|------------|
| Bacteria_Proteobacteria_Gammaproteobacteria_Alteromonadales_Alteromonadaceae_Teredinibacter           | Stormwater |
| Bacteria_Proteobacteria_Gammaproteobacteria_Alteromonadales_Idiomarinaceae                            | Stormwater |
| Bacteria_Proteobacteria_Gammaproteobacteria_Chromatiales_Chromatiaceae_Rheinheimeria                  | Stormwater |
| Bacteria_Proteobacteria_Gammaproteobacteria_Chromatiales_Halothiobacillaceae_Halothiobacillus         | Stormwater |
| Bacteria_Proteobacteria_Gammaproteobacteria_Enterobacteriales_Enterobacteriaceae_Brenneria_salicis    | Stormwater |
| Bacteria_Proteobacteria_Gammaproteobacteria_Enterobacteriales_Enterobacteriaceae_Cronobacter          | Stormwater |
| Bacteria_Proteobacteria_Gammaproteobacteria_Enterobacteriales_Enterobacteriaceae_Enterobacter_cowanii | Stormwater |
| Bacteria_Proteobacteria_Gammaproteobacteria_Enterobacteriales_Enterobacteriaceae_Pantoea_oleae        | Stormwater |
| Bacteria_Proteobacteria_Gammaproteobacteria_Legionellales_Coxiellaceae_Aquicella                      | Stormwater |
| Bacteria_Proteobacteria_Gammaproteobacteria_Legionellales_Coxiellaceae_Coxiella                       | Stormwater |
| Bacteria_Proteobacteria_Gammaproteobacteria_Legionellales_Legionellaceae_Legionella                   | Stormwater |
| Bacteria_Proteobacteria_Gammaproteobacteria_Oceanospirillales_Oceanospirillaceae                      | Stormwater |
| Bacteria_Proteobacteria_Gammaproteobacteria_Pseudomonadales_Moraxellaceae                             | Stormwater |
| Bacteria_Proteobacteria_Gammaproteobacteria_Pseudomonadales_Moraxellaceae_Perlucidibaca               | Stormwater |
| Bacteria_Proteobacteria_Gammaproteobacteria_Pseudomonadales_Pseudomonadaceae_Pseudomonas_cichorii     | Stormwater |
| Bacteria_Proteobacteria_Gammaproteobacteria_Xanthomonadales_Xanthomonadaceae_Lysobacter               | Stormwater |
| Bacteria_Proteobacteria_Gammaproteobacteria_Xanthomonadales_Xanthomonadaceae_Rhodanobacter            | Stormwater |
| Bacteria_Proteobacteria_Gammaproteobacteria_Xanthomonadales_Xanthomonadaceae_Thermomonas              | Stormwater |
| Bacteria_Spirochaetes_Spirochaetes_Spirochaetales_Spirochaetaceae_Spirochaeta                         | Stormwater |
| Bacteria_Spirochaetes_Spirochaetes_Spirochaetales_Spirochaetaceae_Treponema                           | Stormwater |
| Bacteria_TG_1                                                                                         | Stormwater |
| Bacteria_TM6                                                                                          | Stormwater |
| Bacteria_Verrucomicrobia_Spartobacteria_Chthoniobacter                                                | Stormwater |
| Bacteria_Actinobacteria_Actinobacteria_Actinomycetales_Intrasporangiaceae_Oryzihumus                  | Sewage     |
| Bacteria_Actinobacteria_Actinobacteria_Actinomycetales_Microbacteriaceae_Pseudoclavibacter            | Sewage     |
| Bacteria_Actinobacteria_Actinobacteria_Actinomycetales_Micrococcaceae_Rothia                          | Sewage     |
| Bacteria_Actinobacteria_Actinobacteria_Actinomycetales_Mycobacteriaceae_Mycobacterium                 | Sewage     |
| Bacteria_Actinobacteria_Actinobacteria_Actinomycetales_Promicromonosporaceae_Cellulosimicrobium       | Sewage     |

|                                                                                               |        |
|-----------------------------------------------------------------------------------------------|--------|
| Bacteria_Actinobacteria_Actinobacteria_Actinomycetales_Propionibacteriaceae_Micropruina       | Sewage |
| Bacteria_Actinobacteria_Actinobacteria_Actinomycetales_Propionibacteriaceae_Propionicicella   | Sewage |
| Bacteria_Actinobacteria_Actinobacteria_Actinomycetales_Tsukamurellaceae_Tsukamurella          | Sewage |
| Bacteria_Actinobacteria_Actinobacteria_Coriobacteriales_Coriobacteriaceae_Atopobium           | Sewage |
| Bacteria_Actinobacteria_Actinobacteria_Coriobacteriales_Coriobacteriaceae_Olsenella           | Sewage |
| Bacteria_Bacteroidetes_Bacteroidia_Bacteroidales_Porphyromonadaceae_Butyricimonas             | Sewage |
| Bacteria_Bacteroidetes_Bacteroidia_Bacteroidales_Porphyromonadaceae_Odoribacter               | Sewage |
| Bacteria_Bacteroidetes_Bacteroidia_Bacteroidales_Prevotellaceae_Paraprevotella                | Sewage |
| Bacteria_Bacteroidetes_Bacteroidia_Bacteroidales_Prevotellaceae_Xylanibacter                  | Sewage |
| Bacteria_Bacteroidetes_Flavobacteria_Flavobacteriales_Flavobacteriaceae_Mariniflexile         | Sewage |
| Bacteria_Bacteroidetes_Sphingobacteria_Sphingobacteriales_Cytophagaceae_Flexibacter_litoralis | Sewage |
| Bacteria_Fibrobacteres_Fibrobacteria_Fibrobacterales_Fibrobacteraceae_Fibrobacter             | Sewage |
| Bacteria_Firmicutes_Bacilli_Bacillales_Staphylococcaceae_Nosocomiicoccus                      | Sewage |
| Bacteria_Firmicutes_Bacilli_Lactobacillales_Aerococcaceae_Aerococcus                          | Sewage |
| Bacteria_Firmicutes_Bacilli_Lactobacillales_Carnobacteriaceae                                 | Sewage |
| Bacteria_Firmicutes_Bacilli_Lactobacillales_Carnobacteriaceae_Trichococcus_flocculiformis     | Sewage |
| Bacteria_Firmicutes_Bacilli_Lactobacillales_Streptococcaceae_Streptococcus_parauberis         | Sewage |
| Bacteria_Firmicutes_Clostridia_Clostridiales_Clostridiaceae_Acidaminobacter                   | Sewage |
| Bacteria_Firmicutes_Clostridia_Clostridiales_Eubacteriaceae                                   | Sewage |
| Bacteria_Firmicutes_Clostridia_Clostridiales_Lachnospiraceae_Anaerostipes                     | Sewage |
| Bacteria_Firmicutes_Clostridia_Clostridiales_Lachnospiraceae_Lachnospira                      | Sewage |
| Bacteria_Firmicutes_Clostridia_Clostridiales_Lachnospiraceae_Moryella                         | Sewage |
| Bacteria_Firmicutes_Clostridia_Clostridiales_Ruminococcaceae_Anaerotruncus                    | Sewage |
| Bacteria_Firmicutes_Clostridia_Clostridiales_Ruminococcaceae_Butyricicoccus                   | Sewage |
| Bacteria_Firmicutes_Clostridia_Clostridiales_Ruminococcaceae_Faecalibacterium                 | Sewage |
| Bacteria_Firmicutes_Clostridia_Clostridiales_Veillonellaceae_Anaerosinus                      | Sewage |
| Bacteria_Firmicutes_Clostridia_Clostridiales_Veillonellaceae_Dendrosporobacter_quercicolus    | Sewage |
| Bacteria_Firmicutes_Clostridia_Clostridiales_Veillonellaceae_Dialister                        | Sewage |



|                                                                                                                |        |
|----------------------------------------------------------------------------------------------------------------|--------|
| Bacteria_Firmicutes_Clostridia_Clostridiales_Veillonellaceae_Megamonas                                         | Sewage |
| Bacteria_Firmicutes_Clostridia_Clostridiales_Veillonellaceae_Megasphaera                                       | Sewage |
| Bacteria_Firmicutes_Clostridia_Clostridiales_Veillonellaceae_Mitsuokella                                       | Sewage |
| Bacteria_Firmicutes_Clostridia_Clostridiales_Veillonellaceae_Phascalartobacterium                              | Sewage |
| Bacteria_Firmicutes_Clostridia_Clostridiales_Veillonellaceae_Propionispora_hippeii                             | Sewage |
| Bacteria_Firmicutes_Clostridia_Clostridiales_Veillonellaceae_Selenomonas                                       | Sewage |
| Bacteria_Firmicutes_Clostridia_Clostridiales_Veillonellaceae_Thermosinus                                       | Sewage |
| Bacteria_Firmicutes_Erysipelotrichi_Erysipelotrichales_Erysipelotrichaceae_Catenibacterium                     | Sewage |
| Bacteria_Fusobacteria_Fusobacteria_Fusobacteriales_Fusobacteriaceae_Cetobacterium                              | Sewage |
| Bacteria_Fusobacteria_Fusobacteria_Fusobacteriales_Leptotrichiaceae_Leptotrichia                               | Sewage |
| Bacteria_Fusobacteria_Fusobacteria_Fusobacteriales_Leptotrichiaceae_Sealdella_terminidis                       | Sewage |
| Bacteria_Proteobacteria_Betaproteobacteria_Burkholderiales_Alcaligenaceae_Parasutterella                       | Sewage |
| Bacteria_Proteobacteria_Betaproteobacteria_Burkholderiales_Alcaligenaceae_Sutterella                           | Sewage |
| Bacteria_Proteobacteria_Betaproteobacteria_Burkholderiales_Comamonadaceae_Diaphorobacter                       | Sewage |
| Bacteria_Proteobacteria_Betaproteobacteria_Burkholderiales_Comamonadaceae_Sphaerotilus                         | Sewage |
| Bacteria_Proteobacteria_Betaproteobacteria_Neisseriales_Neisseriaceae_Alysiella_crassa                         | Sewage |
| Bacteria_Proteobacteria_Betaproteobacteria_Neisseriales_Neisseriaceae_Aquaspirillum_serpens                    | Sewage |
| Bacteria_Proteobacteria_Betaproteobacteria_Neisseriales_Neisseriaceae_Chromobacterium                          | Sewage |
| Bacteria_Proteobacteria_Betaproteobacteria_Neisseriales_Neisseriaceae_Formivibrio                              | Sewage |
| Bacteria_Proteobacteria_Betaproteobacteria_Neisseriales_Neisseriaceae_Laribacter_hongkongensis                 | Sewage |
| Bacteria_Proteobacteria_Betaproteobacteria_Neisseriales_Neisseriaceae_Neisseria                                | Sewage |
| Bacteria_Proteobacteria_Betaproteobacteria_Neisseriales_Neisseriaceae_Uruburuella                              | Sewage |
| Bacteria_Proteobacteria_Deltaproteobacteria_Desulfobacterales_Desulfobulbaceae_Desulfobacterium                | Sewage |
| Bacteria_Proteobacteria_Deltaproteobacteria_Desulfobacterales_Desulfobulbaceae_Desulfobulbus                   | Sewage |
| Bacteria_Proteobacteria_Epsilonproteobacteria_Campylobacterales_Campylobacteraceae_Arcobacter_butzleri         | Sewage |
| Bacteria_Proteobacteria_Epsilonproteobacteria_Campylobacterales_Campylobacteraceae_Sulfurospirillum_deleyianum | Sewage |
| Bacteria_Proteobacteria_Epsilonproteobacteria_Campylobacterales_Helicobacteraceae_Sulfurimonas                 | Sewage |
| Bacteria_Proteobacteria_Gammaproteobacteria_Alteromonadales_Alteromonadaceae_SAR92                             | Sewage |

|                                                                                                       |        |
|-------------------------------------------------------------------------------------------------------|--------|
| Bacteria_Proteobacteria_Gammaproteobacteria_Enterobacteriales_Enterobacteriaceae_Pectobacterium       | Sewage |
| Bacteria_Proteobacteria_Gammaproteobacteria_Enterobacteriales_Enterobacteriaceae_Yersinia_bercovieri  | Sewage |
| Bacteria_Proteobacteria_Gammaproteobacteria_Thiotrichales_Thiotrichaceae_Thiothrix                    | Sewage |
| Bacteria_Spirochaetes_Spirochaetes_Spirochaetales                                                     | Sewage |
| Bacteria_Verrucomicrobia_Verrucomicrobiae_Verrucomicrobiales_Verrucomicrobiaceae_Akkermansia          | Sewage |
| Bacteria_Actinobacteria_Actinobacteria_Actinomycetales_Frankiaceae_Frankia                            | River  |
| Bacteria_Actinobacteria_Actinobacteria_Actinomycetales_Nocardoidaceae_Actinopolymorpha                | River  |
| Bacteria_Bacteroidetes_Sphingobacteria_Sphingobacteriales_Cytophagaceae_Flectobacillus                | River  |
| Bacteria_Bacteroidetes_Sphingobacteria_Sphingobacteriales_Cytophagaceae_Runella                       | River  |
| Bacteria_Cyanobacteria_Cyanobacteria_SubsectionI_Unassigned_Microcystis                               | River  |
| Bacteria_Cyanobacteria_Cyanobacteria_SubsectionIV_Unassigned_Anabaena                                 | River  |
| Bacteria_Cyanobacteria_Cyanobacteria_SubsectionIV_Unassigned_Aphanizomenon                            | River  |
| Bacteria_Proteobacteria_Alphaproteobacteria_Rhizobiales                                               | River  |
| Bacteria_Proteobacteria_Alphaproteobacteria_Rhodobacterales_Rhodobacteraceae                          | River  |
| Bacteria_Proteobacteria_Alphaproteobacteria_Rhodobacterales_Rhodobacteraceae_Catellibacterium         | River  |
| Bacteria_Proteobacteria_Alphaproteobacteria_Sphingomonadales                                          | River  |
| Bacteria_Proteobacteria_Alphaproteobacteria_Sphingomonadales_Sphingomonadaceae_Novosphingobium        | River  |
| Bacteria_Proteobacteria_Alphaproteobacteria_Sphingomonadales_Sphingomonadaceae_Novosphingobium_lentum | River  |
| Bacteria_Proteobacteria_Betaproteobacteria_Burkholderiales_Comamonadaceae                             | River  |
| Bacteria_Proteobacteria_Betaproteobacteria_Burkholderiales_Comamonadaceae_Comamonas                   | River  |
| Bacteria_Proteobacteria_Betaproteobacteria_Burkholderiales_Comamonadaceae_Delftia                     | River  |
| Bacteria_Proteobacteria_Betaproteobacteria_Burkholderiales_Comamonadaceae_Ideonella                   | River  |
| Bacteria_Proteobacteria_Betaproteobacteria_Burkholderiales_Comamonadaceae_Leptothrix_cholodnii        | River  |
| Bacteria_Proteobacteria_Betaproteobacteria_Burkholderiales_Comamonadaceae_Macromonas                  | River  |
| Bacteria_Proteobacteria_Betaproteobacteria_Burkholderiales_Comamonadaceae_Mitsuaria_chitosanitabida   | River  |
| Bacteria_Proteobacteria_Betaproteobacteria_Burkholderiales_Comamonadaceae_Sphaerotilus_natans         | River  |
| Bacteria_Proteobacteria_Betaproteobacteria_Burkholderiales_Unassigned_Thiomonas                       | River  |
| Bacteria_Proteobacteria_Betaproteobacteria_Neisseriales_Neisseriaceae_Vogesella                       | River  |

|                                                                                                              |        |
|--------------------------------------------------------------------------------------------------------------|--------|
| Bacteria_Proteobacteria_Betaproteobacteria_Rhodocyclales_Rhodocyclaceae_Denitratisoma                        | River  |
| Bacteria_Proteobacteria_Deltaproteobacteria_Syntrophobacterales_Syntrophaceae_Smithella                      | River  |
| Bacteria_Proteobacteria_Gammaproteobacteria_Aeromonadales_Aeromonadaceae_Tolumonas_auensis                   | River  |
| Bacteria_Proteobacteria_Gammaproteobacteria_Methylococcales_Methylococcaceae_Methylomonas                    | River  |
| Bacteria_Proteobacteria_Gammaproteobacteria_Oceanospirillales_Halomonadaceae                                 | River  |
| Bacteria_Cyanobacteria_Cyanobacteria_SubsectionIII_Unassigned_Leptolyngbya                                   | Lake   |
| Bacteria_Proteobacteria_Alphaproteobacteria_Caulobacterales_Caulobacteraceae_Caulobacter                     | Lake   |
| Bacteria_Proteobacteria_Alphaproteobacteria_Rickettsiales_Rickettsiaceae                                     | Lake   |
| Bacteria_Proteobacteria_Alphaproteobacteria_Rickettsiales_Unassigned_Captivus                                | Lake   |
| Bacteria_Proteobacteria_Betaproteobacteria_Burkholderiales_Alcaligenaceae_Achromobacter                      | Lake   |
| Bacteria_Proteobacteria_Betaproteobacteria_Burkholderiales_Burkholderiaceae_Ralstonia                        | Lake   |
| Bacteria_Proteobacteria_Betaproteobacteria_Burkholderiales_Comamonadaceae_Methylibium                        | Lake   |
| Bacteria_Bacteroidetes_Sphingobacteria_Sphingobacteriales_Saprospiraceae_Haliscomenobacter                   | Harbor |
| Bacteria_Chlorobi_Chlorobia_Chlorobiales                                                                     | Harbor |
| Bacteria_Cyanobacteria_Cyanobacteria_SubsectionI                                                             | Harbor |
| Bacteria_Lentisphaerae_Lentisphaeria                                                                         | Harbor |
| Bacteria_Proteobacteria_Alphaproteobacteria_Caulobacterales_Hyphomonadaceae_Hirschia                         | Harbor |
| Bacteria_Proteobacteria_Alphaproteobacteria_Sphingomonadales_Sphingomonadaceae                               | Harbor |
| Bacteria_Proteobacteria_Alphaproteobacteria_Sphingomonadales_Sphingomonadaceae_Sandarakinorhabdus_limnophila | Harbor |
| Bacteria_Proteobacteria_Betaproteobacteria_Burkholderiales_Comamonadaceae_Alicyclophilus                     | Harbor |
| Bacteria_Proteobacteria_Betaproteobacteria_Neisseriales_Neisseriaceae_Leeia                                  | Harbor |
| Bacteria_Proteobacteria_Deltaproteobacteria_Desulfuromonadales                                               | Harbor |
| Bacteria_Proteobacteria_Gammaproteobacteria_Alteromonadales_Alteromonadaceae                                 | Harbor |
| Bacteria_Proteobacteria_Gammaproteobacteria_Alteromonadales_Alteromonadaceae_Marinobacter                    | Harbor |
| Bacteria_Proteobacteria_Gammaproteobacteria_Alteromonadales_Alteromonadaceae_Unassigned_Haliea               | Harbor |
| Bacteria_Proteobacteria_Gammaproteobacteria_Alteromonadales_Idiomarinaceae_Pseudidiomarina                   | Harbor |
| Bacteria_Proteobacteria_Gammaproteobacteria_Oceanospirillales                                                | Harbor |
| Bacteria_Proteobacteria_Gammaproteobacteria_Xanthomonadales_Sinobacteraceae                                  | Harbor |

|                                                                                                               |        |
|---------------------------------------------------------------------------------------------------------------|--------|
| Bacteria_Proteobacteria_Gammaproteobacteria_Xanthomonadales_Sinobacteraceae_Nevskia                           | Harbor |
| Bacteria_Proteobacteria_Gammaproteobacteria_Xanthomonadales_Sinobacteraceae_Steroidobacter                    | Harbor |
| Bacteria_Verrucomicrobia_Opitutae                                                                             | Harbor |
| Bacteria_Verrucomicrobia_Verrucomicrobiae_Verrucomicrobiales_Verrucomicrobiaceae_Prosthecobacter_vanneervanii | Harbor |
| Bacteria_Verrucomicrobia_Verrucomicrobiae_Verrucomicrobiales_Verrucomicrobiaceae_Verrucomicrobium             | Harbor |

---
